# Supplementary material
Source: HighWire-hosted journal article supplement (https://pn.bmj.com/highwire/filestream/150546/field_highwire_adjunct_files/8/pn-2023-003708supp009_data_supplement.pdf)
Supplement: pn-2023-003708supp009_data_supplement.pdf [file pn-2023-003708supp009_data_supplement.pdf]

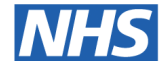

University College London Hospitals

NHS Foundation Trust

## First line immunosuppression in neuromuscular disease:

Initiation checklist

Patient details:

Diagnosis:

Definite ☐

Probable ☐

Possible ☐

Evidence-based therapy:

Y ☐

N ☐

Patient information booklet provided:

Y ☐

N ☐

Informed consent

Y ☐

N ☐

• Discussed alternatives

Y ☐

N ☐

• Drug-specific risks discussed

Y ☐

N ☐

General risk assessment:

• Baseline bloods ☐

Y ☐

N ☐

◦ Normal

Y ☐

N ☐

• TB: low risk ☐

High risk/ treatment required ☐

• Flu/ pneumococcal vaccinations:

Y ☐

N ☐

• Baseline

◦ Lung disease:

Y ☐

N ☐

◦ Liver disease

Y ☐

N ☐

◦ Renal impairment

Y ☐

N ☐

• HIV, HBV, HVC checked

Y ☐

N ☐

• Cardiovascular risk:

Y ☐

N ☐

◦ Primary prevention

Y ☐

N ☐

• PJP prophylaxis required

Y ☐

N ☐

• Bone protection required

Y ☐

N ☐

◦ FRAX

Y ☐

N ☐

◦ Vit D/ Calcium screen

Y ☐

N ☐

• Pregnant

Y ☐

N ☐

◦ Contraception advice

Y ☐

N ☐

Drug specific monitoring

• As per guideline

Y ☐

N ☐

◦ Normal

Y ☐

N ☐

Outcome measures and baseline measurements:

|    | Date: |
|----|-------|
| 1. |       |
| 2. |       |
| 3. |       |
| 4. |       |

uclh
